# Supplementary material for: Zn2+catalysed hydrolysis of β-lactams: experimental and theoretical studies on the influence of the β-lactam structure
Source: Royal Society of Chemistry journal article supplement (doi:10.1039/b306799h), 2004-01-01
Supplement: b306799h.doc [file b306799h.doc]

**Zn2+-Catalysed Hydrolysis of -lactams:**

**Experimental and Theoretical Studies on the Influence of the -lactam Structure**

Natalia Díaz, Tomás L. Sordo, Dimas Suárez, *

Rosa Méndez and Javier Martín-Villacorta*

**Supplementary Information**

The kinetic scheme developed for the Zn2+-Tris-clavulanate system would be analogous to that proposed by Schwartz for Zn2+-Tris-benzylpenicillin [10]:

*K*p

Zn2+ + C – + T ZnTC + ZnTCº + H + [1]

↓*k*

products

where C – is the clavulanate ionand T is the free base of Tris. The mechanism involving the ternary complex as follows:

*K*1

Zn 2+ + T ZnT 2+ [2]

*K*2

ZnT 2+ + T ZnT2 2+ [3]

These coordination compounds may lose a proton as in the following equilibria:

*K*a1

ZnT 2+ ZnT + + H + [4]

*K*a2

ZnT2 2+ ZnT2 + + H + [5]

At the pH levels of our experiments, the hydrolysis of Zn 2+ must be taken into account, according to the following equilibrium:

*K*h

Zn 2+ + H2O ZnOH + + H + [6]

The formation of the ternary coordination compound must take place when the ZnT 2+ complex links with the clavulanate. Furthermore, clavulanate bonds with Zn 2+ to give a binary complex[12] with a formation constantof *K*= 89. The ternary compound loses a proton, giving rise to the species ZnTCº, which evolves into products. The schematics of these processes are as follows:

*K*3

ZnT 2+ + C - ZnTC + [7]

*K*p

ZnTC +  ZnTCº + H + [8]

*k*

ZnTCº → Products [9]

The reaction rate must be proportional to the concentration of ZnTC º :

*kK*p *k K*p

Rate = *k* [ZnTC º] = ——— [ ZnTC +] = ——— *K*1*K*3 [Zn 2+] [T] [C -] [10]

[H +] [H +]

Under the condition [T] >> [C -] >>[Zn]o, the stoichiometric concentration of zinc ion in the system [Zn]o will be the sum of all species present:

*K*a1  *K*a2 *K*p

## [Zn]o = [Zn2+]+ [ZnT2+][1+ —— ] + [ZnT22+][1+ —— ] + [ZnTC+][1+ —— ] + [ZnOH+] [11]

[H+] [H+] [H+]

Using the equilibrium relationships from Eqs. [2], [3], [6]and [7]:

*K*a1 *K*a2 *K*p *K*h

[Zn]o = [Zn2+] {1 + *K*1 [T] [1+ **——** ] **+** *K*1 *K*2 [T]2 [1+ **——** ] **+** *K*1 *K*3 [T] [C] [1+ **——** ] **+ —— }**

[H+] [H+] [H+] [H+]

[12]

Substituting [Zn 2+] into Eq. [10]:

*k* *K*p

—— *K*1*K*3 [Zn]o [T] [C -]

[H+]

Rate = ———————————————————————————————— [13]

*K*h *K*a1 *K*a2 *K*p

1+ —— + *K*1 [T] [1+ —— ] + *K*1 *K*2 [T]2 [1+ —— ] + *K*1*K*3 [T] [C -] [1+ —— ]

[H+] [H+] [H+] [H+]

These expressions are analogous to those deduced by Schwartz[10]

In the case where the initial concentration of clavulanate [C]o was 5x10-4 *M*, only first-order kinetics were observed. It seems reasonable therefore that the last term in the denominator may be neglected under those circumstances

*K*h

Dividing the numerator and the denominator by 1 + —— and disregarding the

[H+]

last element of the denominator leaves[10]:

*k K*p *K*1 *K*3

————— [T]

*k*z [H+] + *K*h

—— = ——————————————————————— [14]

[Zn]o [H+] + *K*a1 [H+] + *K*a2

1 + K1 [T] ————— + K1 K2 [T]2 —————

[H+] + *K*h [H+] + *K*h

where *k*z is *k*obs minus the catalytic action of the basic species of Tris. Let:

*k K*p *K*1 *K*3

*a* = ————— [15]

[H+] + *K*h

[H+] + *K*a1

*b* = K1 ————— [16]

[H+] + *K*h

[H+] + *K*a2

*c* = *K*1 *K*2 ————— [17]

[H+] + *K*h

From Eq. [15] it can be seen that a plot of log *a* vs pH will give the typical curve for an ionizing species. Such a plot is shown in Figure10.

**Figure 10.** Plot of log *a* from Eq. [15] as a function of pH.

Equation (12) may be expressed thus:

*k*z *a* [T]

—— = —————————— [18] in the manuscript Eq. [2]

[Zn]o 1 + *b* [T] + *c* [T]2

Adjustment by multivariant regression[[1]](#footnote-2)** of the values of the constant kz and the concentration of Tris to Equation (18) made it possible to determine the values of parameters a, b, and c, set out in Table 3.

**Table 3.** Values of parameters *a*, *b* and *c* of Equation (18) at the different pH levels.

| **pH** | ***a* x 10-6** | ***b* x 10-2** | ***c* x 10-3** |
| --- | --- | --- | --- |
| 7.50 | 0.671 | 1.78 | 3.21 |
| 8.00 | 1.39 | 2.26 | 2.28 |
| 8.50 | 2.32 | 1.93 | 2.22 |
| 9.00 | 2.60 | 1.95 | 1.01 |
| 9.50 | 3.62 | 2.12 | 0.883 |

Equations (15), (16) and (17) may be reordered thus:

-*a* [H+] constant

*a* = ——— + ———— [19]

*K*h *K*h

*b* ([H+] + *K*h) = K1 [H+] + *K*1*K*a1 [20]

*c* ([H+] + *K*h) = *K*1 *K*2 [H+] + *K*1 *K*2 *K*a2  [21]

The plot of the first member of these equations *versus* the concentration of protons must be a straight line in all cases.

The plot of Equation (19) gives a slope of – 1/*K*h. This equation is represented in Figure 11, where the value obtained for *K*h was 7.7 x 10-9.

**Figure 11.** Representation of Equation (19).

From Equation (20), plotted in Figure 12, it may be determined that *K*1 = 170 as the slope and *K*a1 = 9.9 x 10-9 as a quotient between the intercept and the slope. Analogously, from Equation (21), plotted in Figure 13, we may determine the value of *K*1 *K*2 as a slope, obtaining for *K*2 constant the value 22, and from the quotient between the intercept and the slope the value of Ka2 = 1.8 x 10-9.

**Figure 12.** Representation of Equation (20).

**Figure 13.** Representation of Equation (21).

The value of *K*3 = 26 may be determined from the slope, 102 min, and the intercept, 1.65 x 103 mol-1dm3 min, of Figure 2 (see manuscript) and Equation (13). The value of *K*p cannot be determined; if it is similar to that of *K*a2, the value of *k* will be 4 x 103 min-1, which explains the rapid decomposition of clavulanate anion in the presence of Zn2+- Tris.

The values thus obtained are in good agreement with those obtained by Schwartz while studying the stability of benzylpenicillin in the presence of the Zn2+-Tris system. The mechanism constants obtained for the degradation of benzylpenicillin and clavulanate are:

| **Benzylpenicillin in the presence of the Zn2+-Tris** | **Clavulanate in the presence of the Zn2+-Tris** |
| --- | --- |
| *K*1 = 180 | *K*1 = 170 |
| *K*2 = 15 – 30 | *K*2 = 22 |
| *K*3 = 28 | *K*3 = 26 |
| *K*a1 = 1.7 x 10-9 | *K*a1 = 9.9 x 10-9 |
| *K*a2 = 1.7 x 10-9 | *K*a2 = 1.8 x 10-9 |
| *K*h = 6.4 x 10-9 | *K*h = 7.7 x 10-9 |
| *K*p = 1.7 x 10-9 | *K*p = 1.8 x 10-9 |
| *k* = 2.5 x 104 min-1 | *k* = 4 x 103 min-1 |

1. * Program ZXSSQ, International Mathematic and Statistics Library, Houston, Texas [↑](#footnote-ref-2)
